# Supplementary material for: Heat shock factor 5 correlated with immune infiltration serves as a prognostic biomarker in lung adenocarcinoma
Source: PubMed Central journal article supplement (PMC7757139; doi:10.7150/ijms.51297), 2021-01-01
Supplement: ijmsv18p0448s1.pdf [file ijmsv18p0448s1.pdf]

## Supplementary Figures

### Supplementary figure 1.

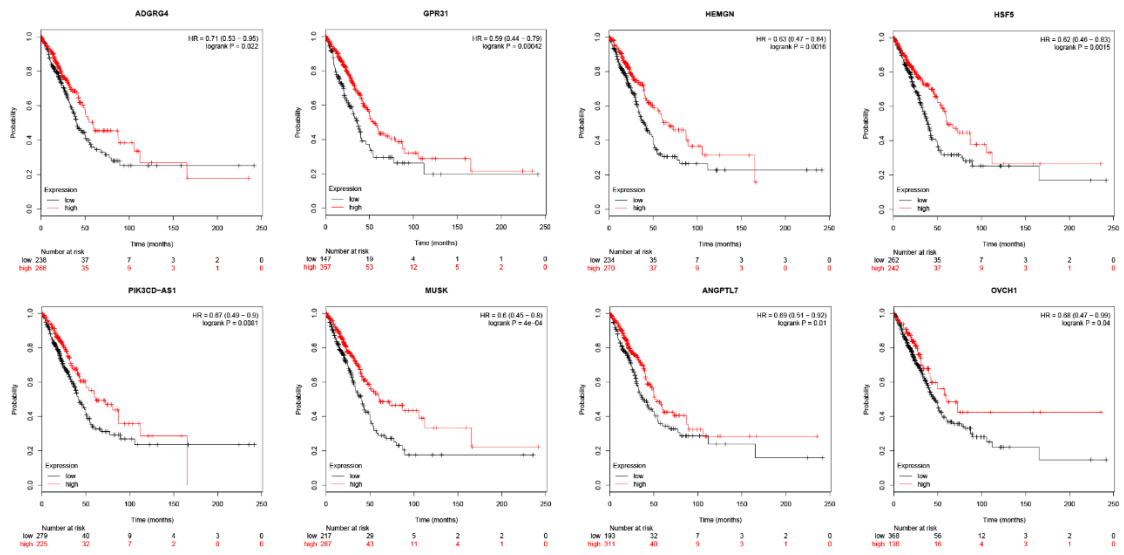

Supplementary figure 1. Verification of the genes of prognostic value in the Kaplan-Meier plotter

database.

## Supplementary Figure 2.

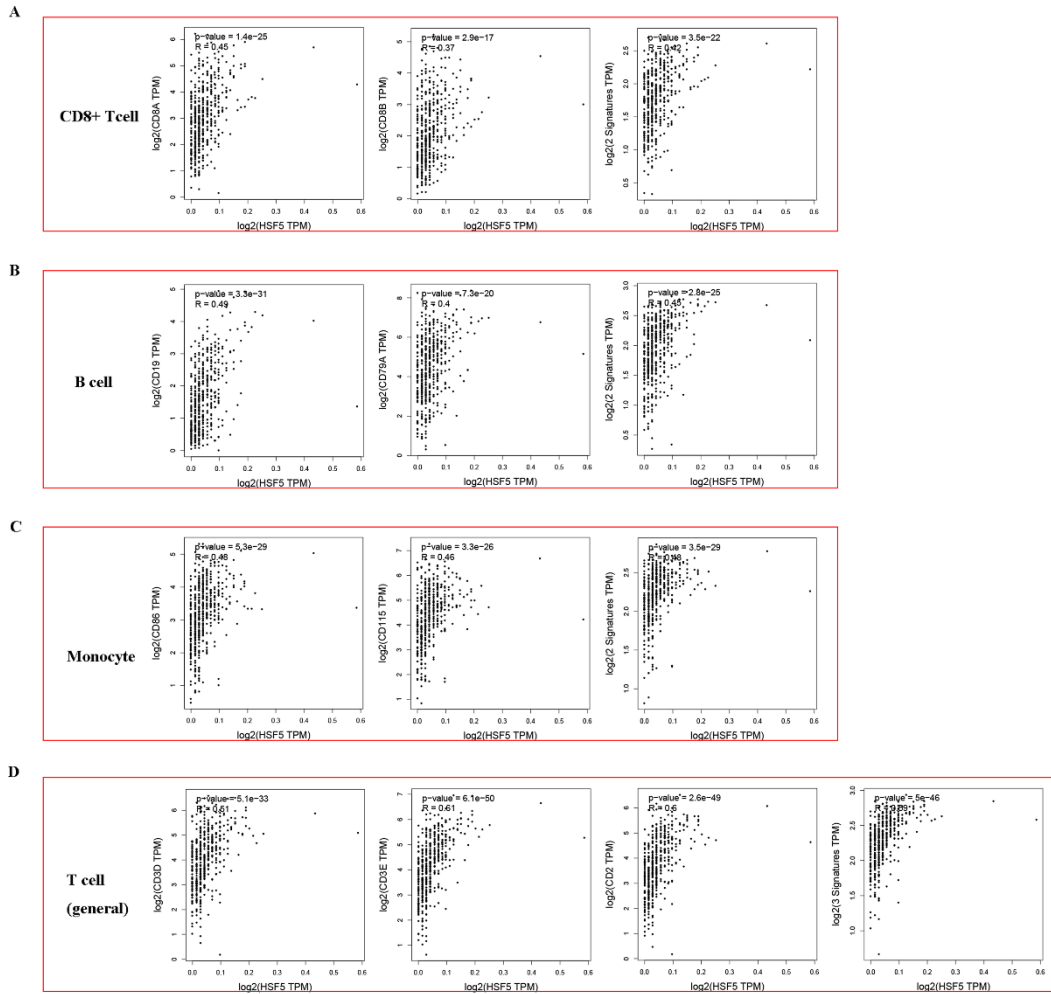

**Supplementary Figure 2. Correlation of HSF5 and immune marker sets of various immune cells in LUAD.** CD8A and CD8B of CD8+T cells (A), CD86 and CD115 of monocytes (B), CD19 and CD79A of B cells (C), CD3D, CD3E and CD2 of general T cells (D), are significantly associated with HSF5 expression based on GEPIA database.
